# Supplementary material
Source: PubMed Central journal article supplement (PMC3791307)
Supplement: mmc1.pdf [file mmc1.pdf]

## Supplementary Material for:

# Mapping the Interactions between the Alzheimer's A $\beta$ -Peptide and Human Serum Albumin beyond Domain Resolution

*Moustafa Algamal<sup>1,§</sup>, Julijana Milojevic<sup>1,§</sup>, Naeimeh Jafari<sup>1</sup>, William Zhang<sup>1</sup>  
and Giuseppe Melacini<sup>1,2,\*</sup>*

<sup>1</sup>Department of Chemistry and Chemical Biology and <sup>2</sup>Department of Biochemistry and Biomedical Sciences, McMaster University, 1280 Main Street West, Hamilton, Ontario, L8S 4M1, Canada.

<sup>§</sup>These authors contributed equally to this work.

\*Correspondence to: [melacin@mcmaster.ca](mailto:melacin@mcmaster.ca)

## Supplementary Figure Captions

**Figure S1.** Effect of free myristic acid on the A $\beta$  (1-42) aggregation profile. White circles represent the 1D NMR signal intensities of 90  $\mu$ M A $\beta$  (1-42) vs. time, while the black circles represent the 1D NMR signal intensities of 90  $\mu$ M A $\beta$  in the presence of 30  $\mu$ M myristic acid. Signal intensities were measured using a Bruker Avance 700 MHz spectrometer equipped with a 5 mm TCI Cyroprobe at 37 °C.

**Figure S2.** Three residue average local backbone RMSDs computed for domain 3 using the structures of HSA in the apo and myristic acid-bound forms (PDB codes 1AO6 and 1E7G, respectively). Secondary structure elements of domain 3 are shown in the upper area, while residues in direct contact with myristic acid are indicated using circles and dotted red lines. Local RMSDs were calculated using MOLMOL (27), while contact residues were extracted from the PDB files using Ligand Explorer Software (39). The black dotted vertical line indicates the sub-domain 3A / 3B boundary, while residues highlighted in grey indicate the HSA derived peptides used in this study (Figures 5 and 6).

**Figure S3.** Binding of octanoic acid to 10  $\mu$ M wild-type domain 3 and fatty acid silencing mutants as monitored by STD NMR titration in D<sub>2</sub>O. The black triangles in panels (a), (b) and (c) represent dose-response curves for octanoic acid binding to K525A, R410AY411A and R485AS489A domain 3 mutants, respectively. As a reference, the wild type domain 3 dose-response STD curve is shown in white circles for each mutant. All the mutants showed a one third drop in their saturation regions relative to wild type.

**Figure S4.** (a) STD based dose-response curve for myristic acid binding to sub-domain 3B. (b) Effect of myristic acid on the inhibition of A $\beta$  (1-42) aggregation by HSA sub-domain 3B. 1D <sup>1</sup>H-NMR signal intensities of 90  $\mu$ M A $\beta$  (1-42) recoded over time are shown in the absence (filled triangles) and in the presence of sub-domain 3B either in the apo form (open squares) or bound to myristic acid (filled circles).

**Figure S5.** ThT fluorescence for the HSA (494-515) peptide (black circles) at 120  $\mu$ M, showing that this peptide does not form cross- $\beta$  amyloid fibrils under our experimental conditions. These conditions differ markedly from those used in the original Waltz protocol (28) in which higher concentrations of peptide and buffer (500 mM phosphate buffer) were employed, explaining why under our experimental conditions no cross- $\beta$  amyloid fibrils were observed for HSA (494-515). The ThT fluorescence of 90  $\mu$ M A $\beta$  (1-42) alone (Figure 6) is reported here as well (white circles) for the convenience of comparison.

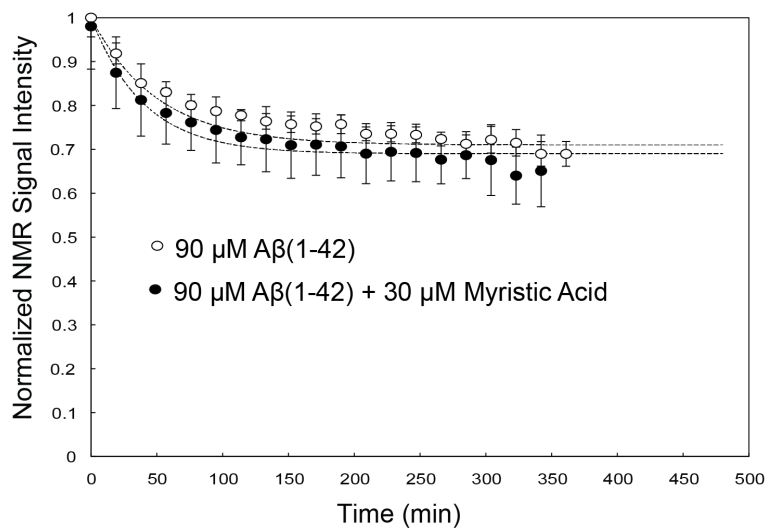

**Figure S1**

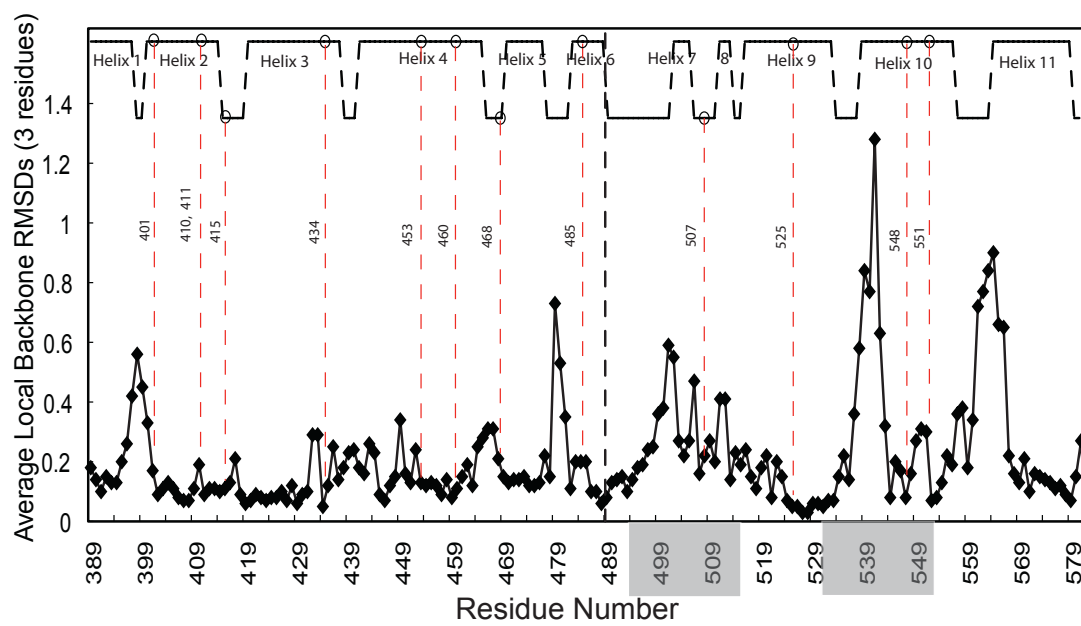

Figure S2

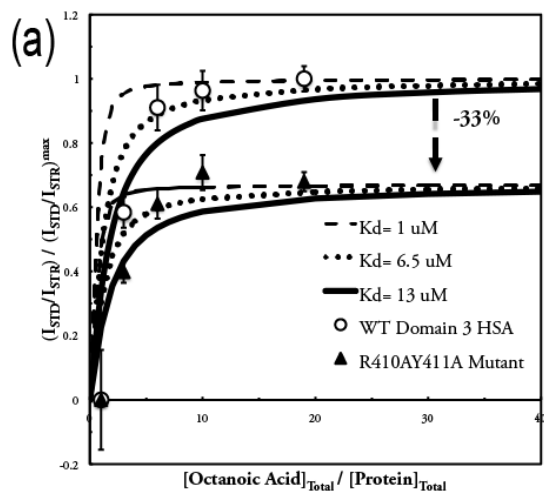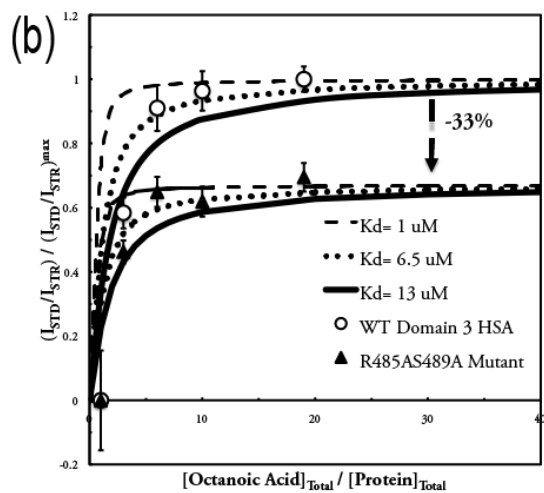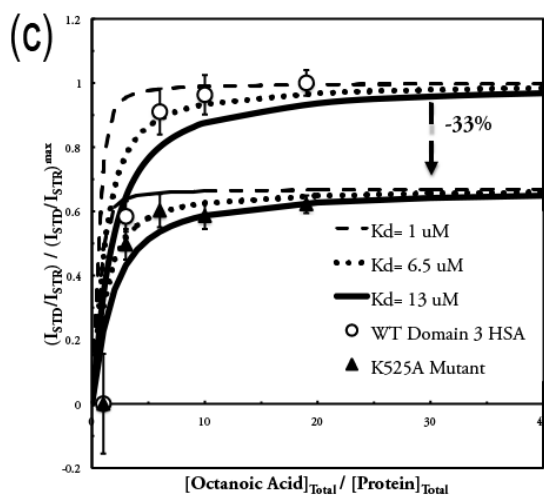

Figure S3

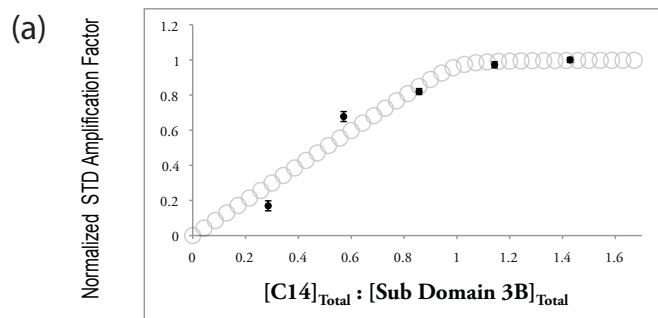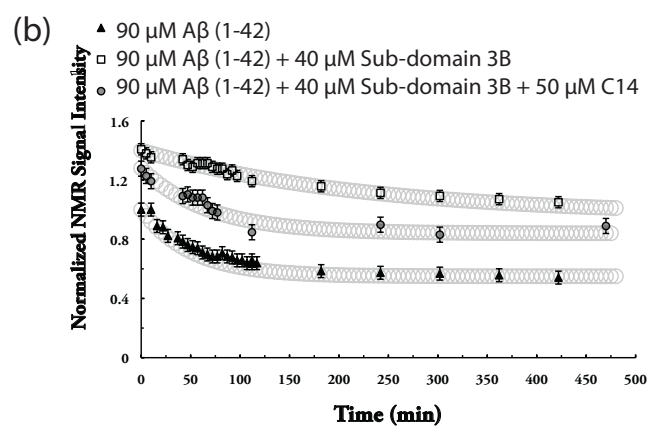

Figure S4

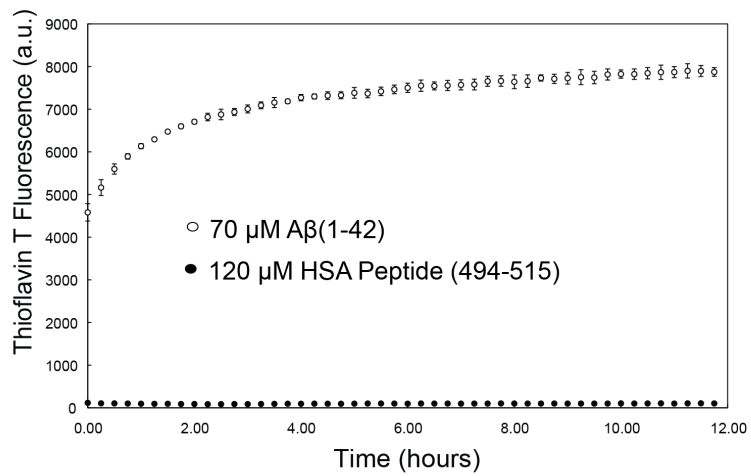

**Figure S5**
